# Supplementary material for: The N-Terminal Region of Fibrillin-1 Mediates a Bipartite Interaction with LTBP1
Source: PubMed Central journal article supplement (PMC5548924; doi:10.1016/j.str.2017.06.003), 2017-08-01
Supplement: mmc1.pdf [file mmc1.pdf]

**Structure, Volume 25**

**Supplemental Information**

**The N-Terminal Region of Fibrillin-1 Mediates**

**a Bipartite Interaction with LTBP1**

**Ian B. Robertson, Hans F. Dias, Isabelle H. Osuch, Edward D. Lowe, Sacha A. Jensen, Christina Redfield, and Penny A. Handford**

Supplemental Figures

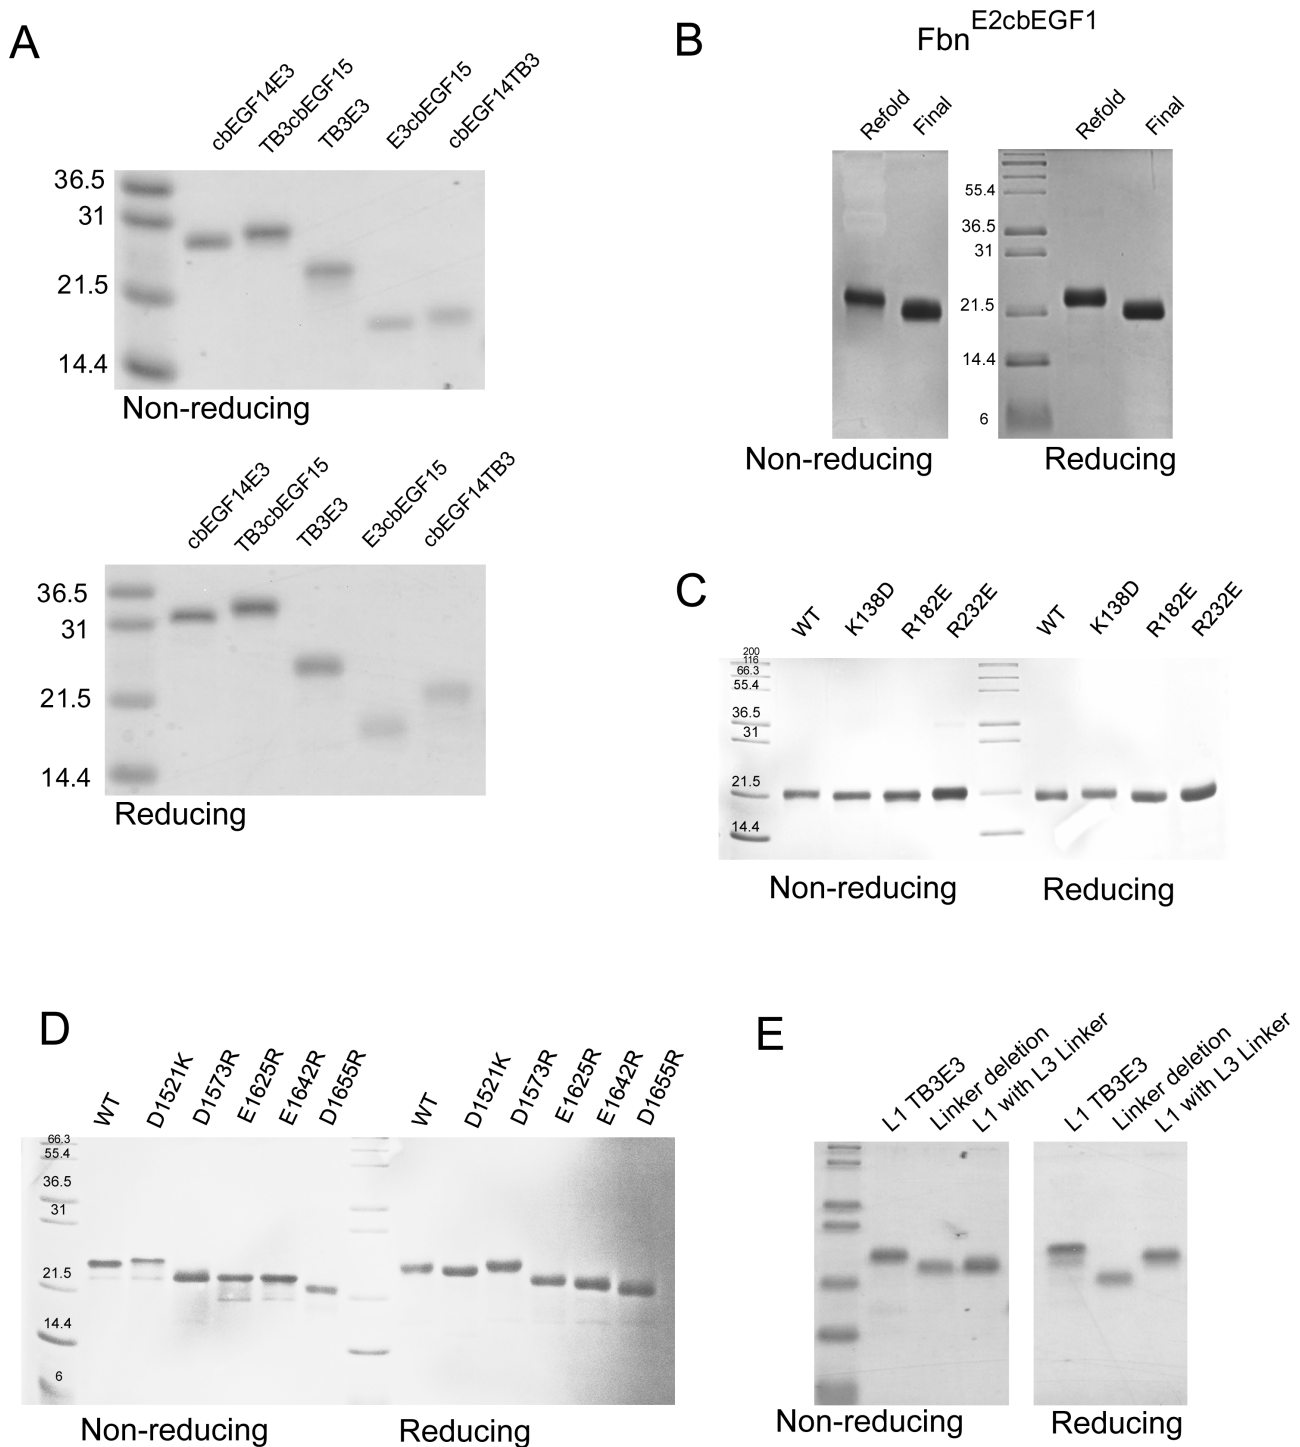

**Figure S1. Related to Figure 1, 2, 7 and 8. SDS-PAGE of constructs used in this study.**

Coomassie stained SDS-PAGE of protein fragments used in this study. Both non-reducing and reducing gels are shown. (A) Wild-type LTBP1 constructs. (B) FBN1 EGF2-EGF3-Hyb1-cbEGF1 construct. (C) FBN1 variants used to test salt bridges. (D) LTBP1 variants used to test salt bridges. (E) LTBP1 linker variants. All constructs show a good degree of purity under both reducing and non-reducing conditions. Mark 12 (Invitrogen) was used as the protein standard.

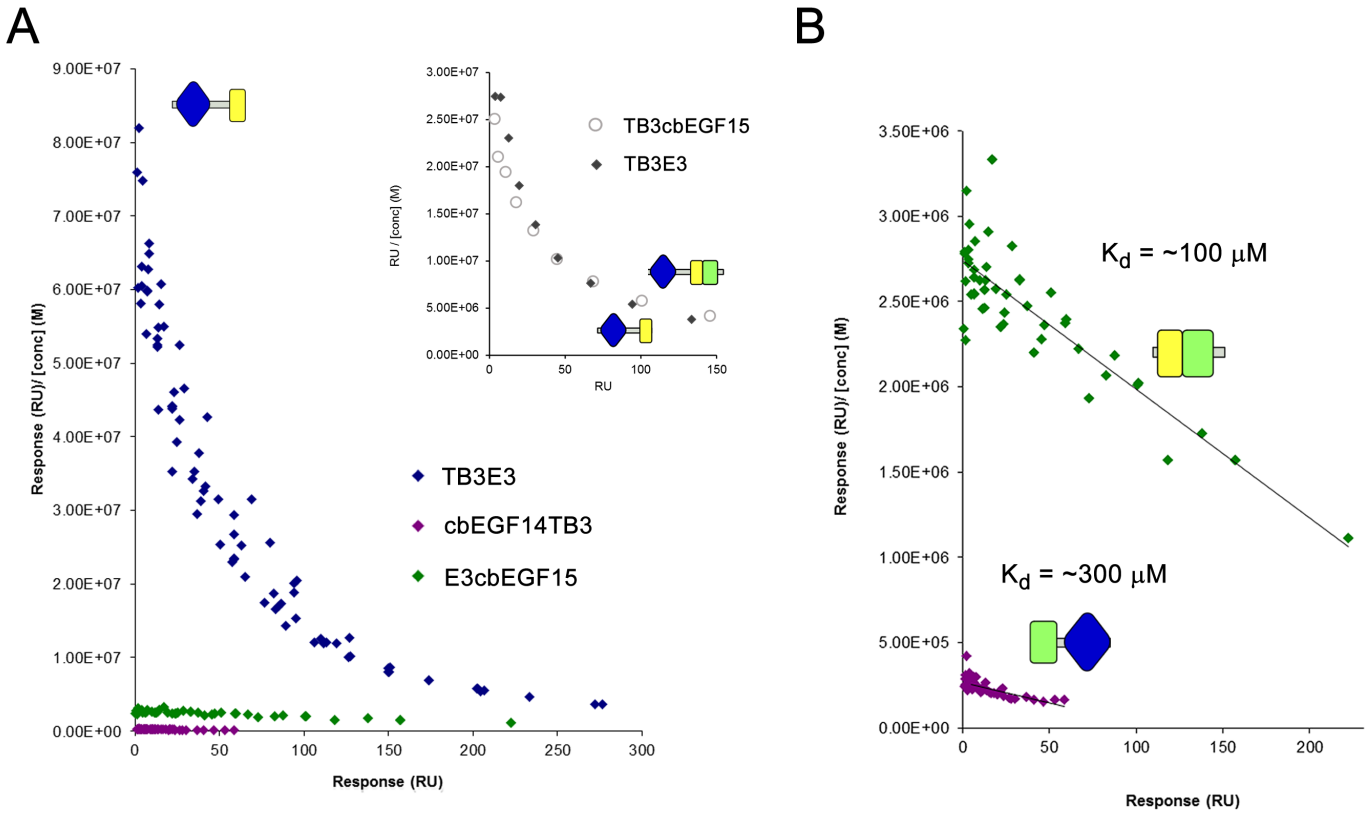

**Figure S2. Related to Figure 1 and 2. Scatchard plots**

Scatchard plots of single-cycle SPR data. In A) it can be seen that the interaction of  $\text{LTBP1}^{\text{TB3E3}}$  with  $\text{FBN1}^{\text{E2cbEGF1}}$  gives a non-linear Scatchard plot both with the single-cycle SPR method (main) and multi-cycle method (inset). This is consistent with complex kinetics of this interaction and makes determination of a single  $K_d$  impossible. Using the lowest concentration data from the single-cycle SPR, a  $K_d$  value in the range of  $0.5\text{-}1\mu\text{M}$  can be estimated. In the multi-cycle data (shown in the inset) it is clear that  $\text{LTBP1}^{\text{TB3cbEGF15}}$  and  $\text{LTBP1}^{\text{TB3E3}}$  behave in a very similar manner in SPR, as they do in the plate assay (Figure 1C). B) The Scatchard plots of the more weakly binding  $\text{LTBP1}$  constructs show more linear behaviour.  $K_d$  estimates are shown although saturation was not reached in these experiments.

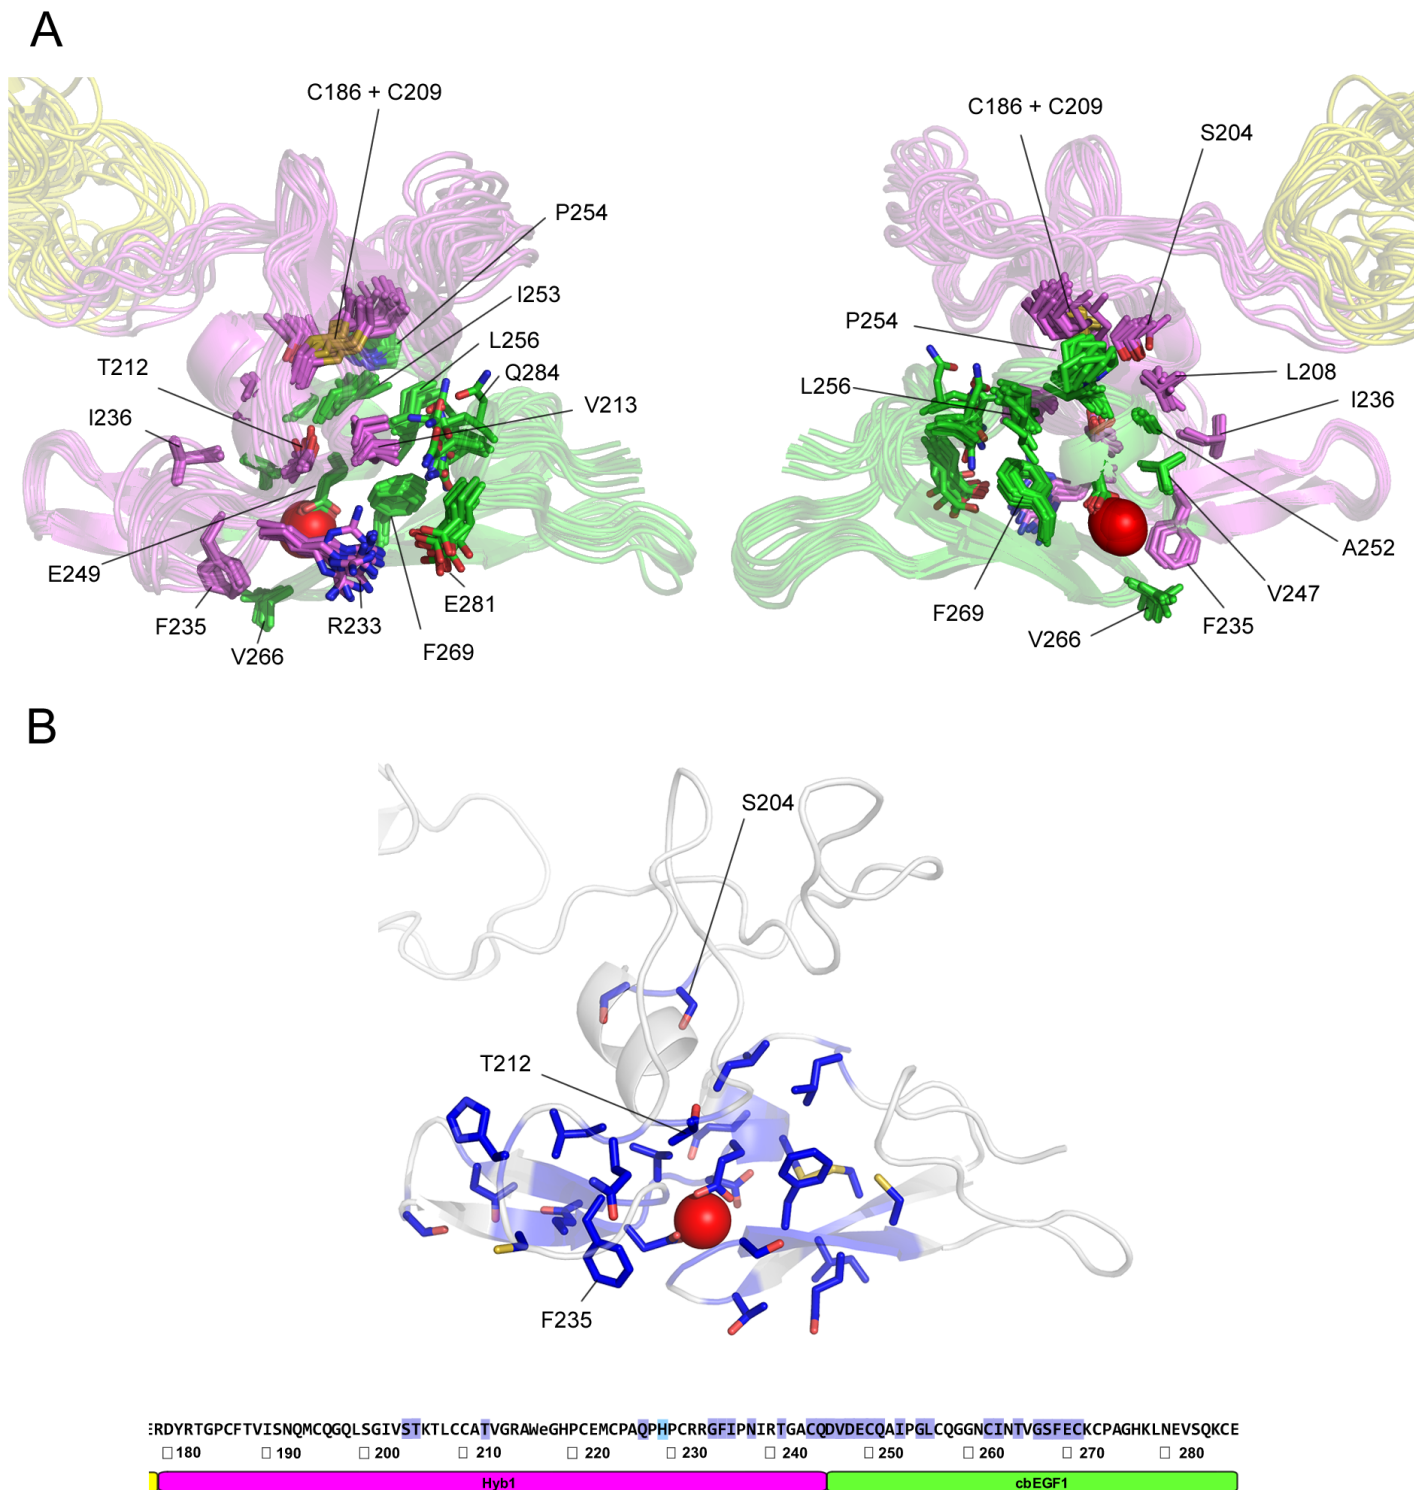

**Figure S3. Related to Figure 6 and Table 1. Structure of the Hyb1-cbEGF1 inter-domain interface**

(A) Two views of the interface between Hyb1 and cbEGF1 is defined by 74 unambiguous NOE restraints. A number of hydrophobic side chains define an extensive interface between Hyb1 (pink) and cbEGF1 (green), with interface side chains represented here as sticks. This interface surrounds the  $\text{Ca}^{2+}$ -binding site (red sphere) and may contribute to its high affinity. In many structures there is also a putative salt bridge between R233 in Hyb1 and E281 in cbEGF1. For clarity only 12 of the 20 structures in the ensemble are shown. (B) Residues in FBN1<sup>E2cbEGF1</sup> with  $\text{Ca}^{2+}$ -sensitive NMR peaks are highlighted blue in the FBN1<sup>E2cbEGF1</sup> sequence, and represented as blue sticks in the consensus structure.

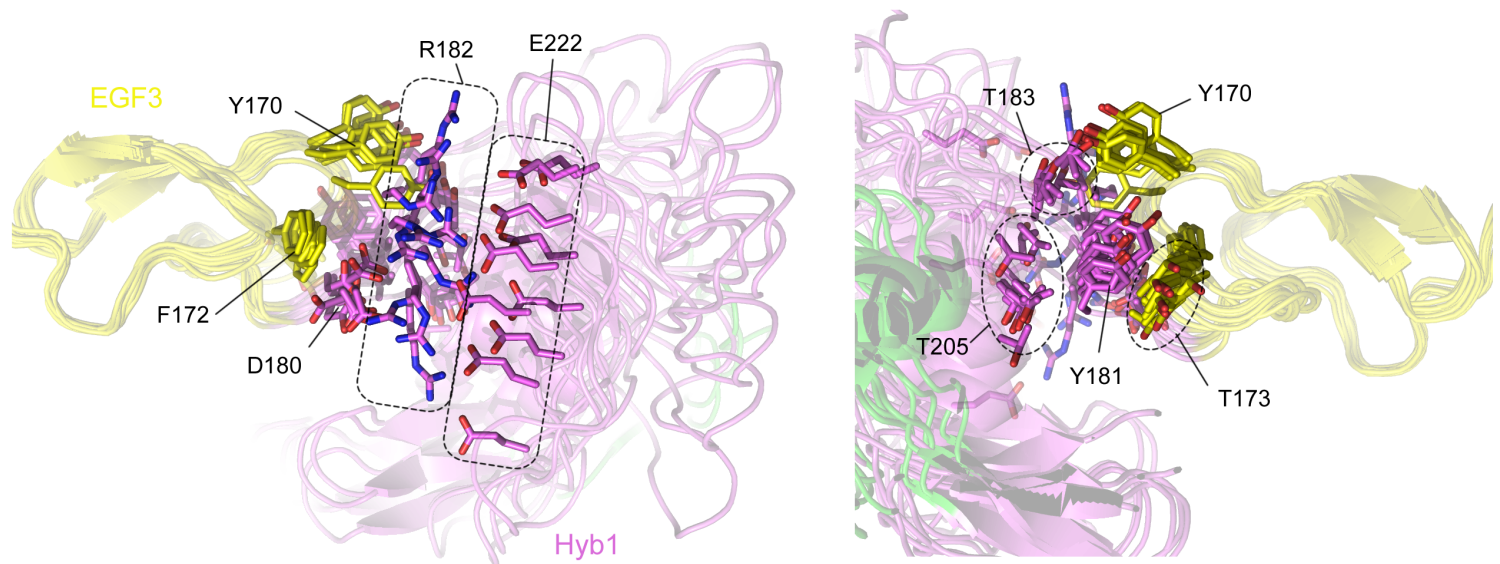

**Figure S4. Related to Figure 6 and Table 1. Structure of the EGF3-Hyb1 inter-domain interface**

Two views of the EGF3-Hyb1 inter-domain interface. Only a small number of residues define the EGF3-Hyb1 interface and this introduces some ambiguity into the relative orientation of EGF3 and Hyb1. However, the observed NOEs do define hydrophobic interactions between the aromatic side chains of Y170, F172, and Y181, and methyl groups of T173, T183 and T205. Furthermore in many structures R182 and E222 are close enough together that they could potentially form a salt bridge that could stabilise the inter-domain interface, although this salt bridge could still support a number of different domain orientations. The structures have been superimposed on EGF3 and the spread of orientations for Hyb1 can be seen. For clarity only 10 of the 20 structure ensemble are shown here.

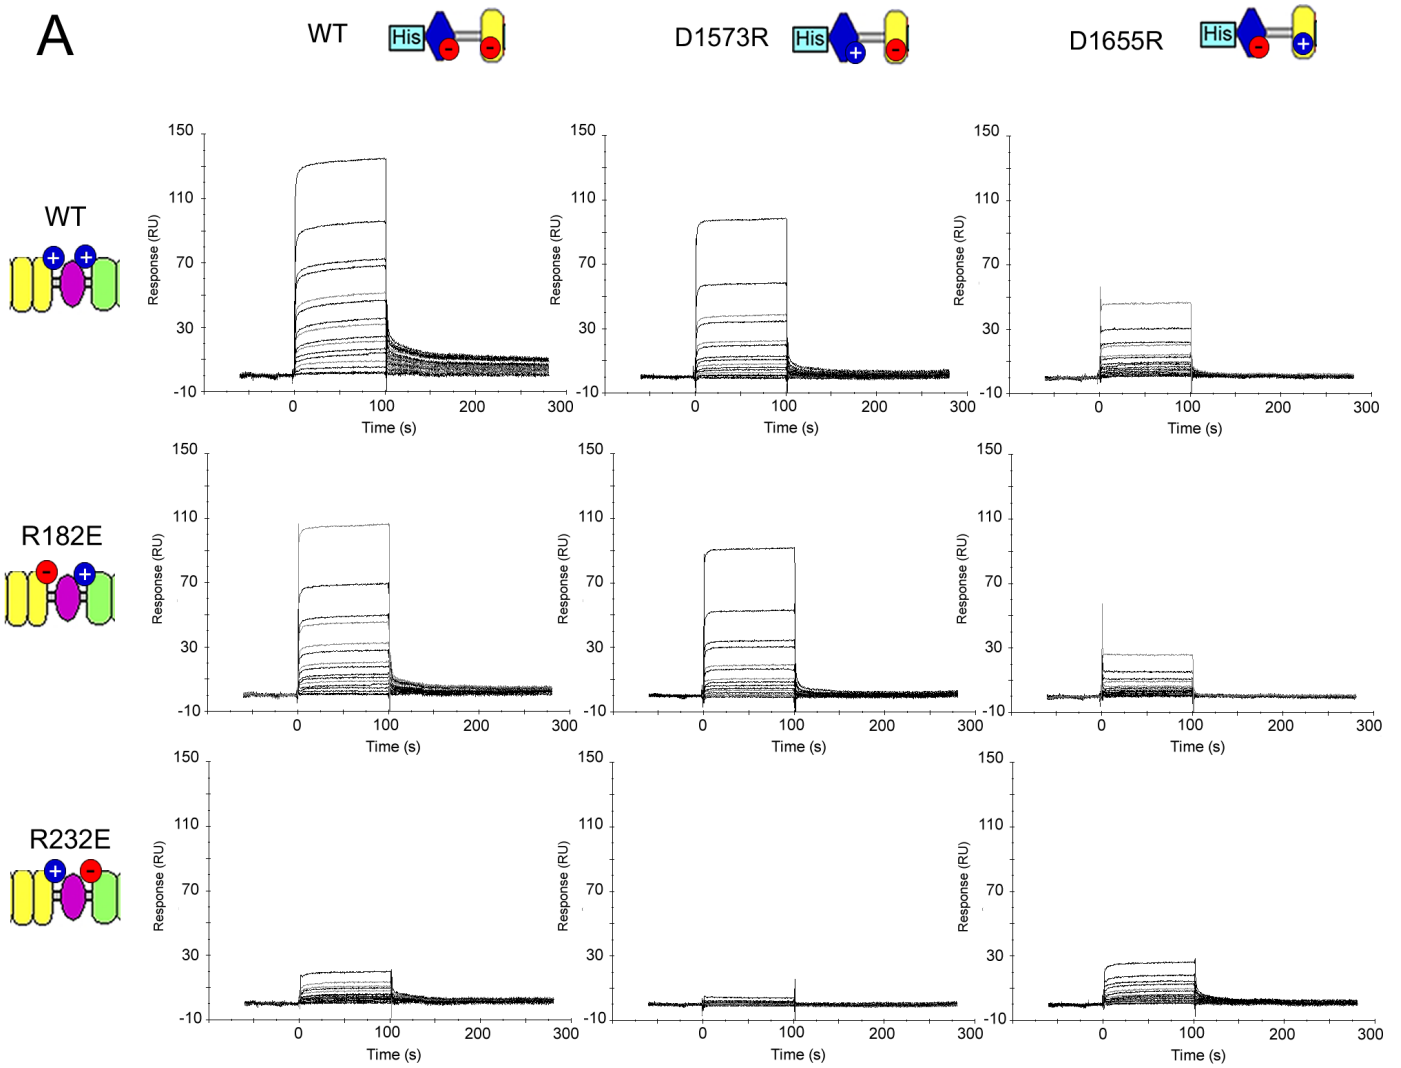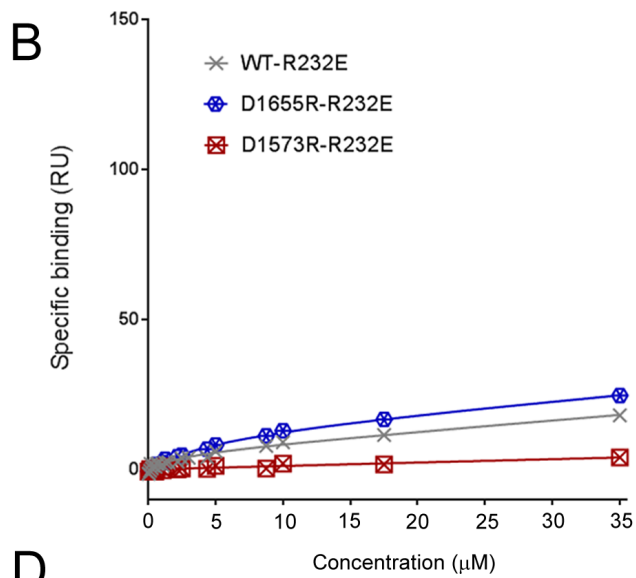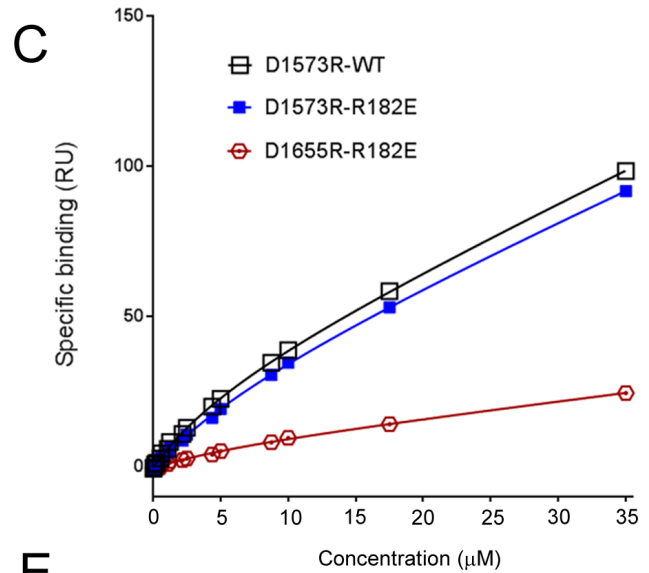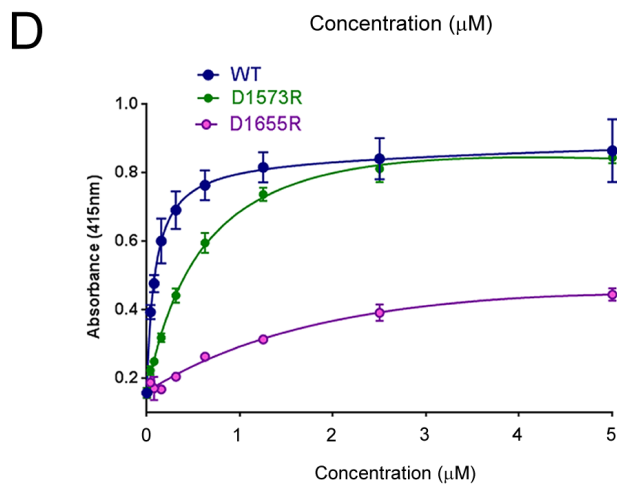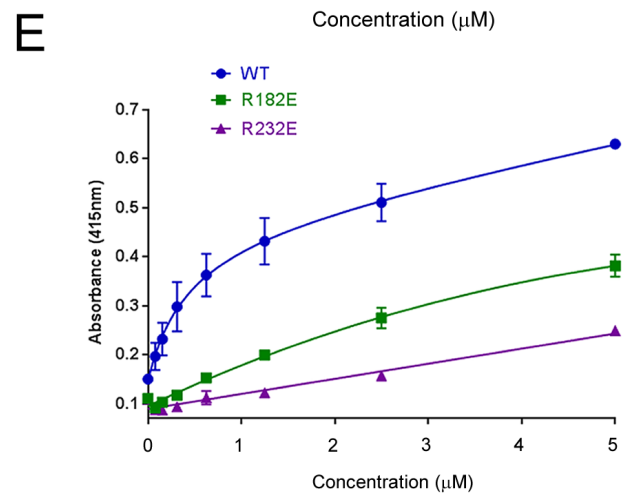

**Figure S5. Related to Figure 7. SPR and Plate-based assays of LTBP1 and FBN1 charge reversal substitutions**

(A) Blank subtracted multi-cycle SPR data with WT and charge-reversal FBN1<sup>E2cbEGF1</sup> fragments amine-coupled to the chip. LTBP1<sup>TB3E3</sup> fragments were injected as analytes at concentrations of 35, 17.5, 10, 8.75, 5, 4.38, 2.5, 2.18, 1.25, 1.09, 0.625, 0.547, 0.273, 0.137, 0.068, and 0.034  $\mu$ M. (B) Plot of SPR responses from (A) for WT, D1655R LTBP1<sup>TB3E3</sup> and D1573R LTBP1<sup>TB3E3</sup> constructs binding FBN1<sup>E2cbEGF1</sup> with the R232E substitution. (C) Plot of SPR responses from (A) for D1573R and D1655R LTBP1<sup>TB3E3</sup> constructs binding WT and R182E FBN1<sup>E2cbEGF1</sup>. The results in (B) show that the combination of D1655R LTBP1 and R232E FBN1 substitutions, which are residues involved in a putative salt bridge, gives no significant additional loss in binding compared to the single R232E substitution. This is consistent with these residues interacting with each other and not other residues in the FBN1/LTBP1 binding site; if these substitutions acted independently then an additive effect further reducing binding would be expected. The same is observed in (C) for the D1573R and R182E substitutions. In contrast to this, in (B) the combination of D1573R LTBP1 and R232E FBN1 substitutions, which are residues involved in two different putative salt bridges, gives an additional loss in binding compared to the single R232E substitution. This is consistent with these residues acting independently in two salt bridges giving an additive effect that further reduces binding. The same is observed in (C) for the D1655R and R182E substitutions. (D) Plate-binding assay data collected from a FBN1<sup>E2cbEGF1</sup> coated plate with two LTBP1<sup>TB3E3</sup> substitutions of interest, D1573R (green) and D1655R (magenta), compared to WT (blue). (E) Plate-binding assay data collected from wells coated with either WT Fbn<sup>E2cbEGF1</sup>, R182E Fbn<sup>E2cbEGF1</sup> or R232E Fbn<sup>E2cbEGF1</sup>. The data presented for each protein in (D) and (E) are from a single plate; three repeats of each protein concentration were carried out to determine experimental error (standard deviation). The plate-binding assay data in (D) and (E) confirm the SPR results shown in Figure 7 D and E.

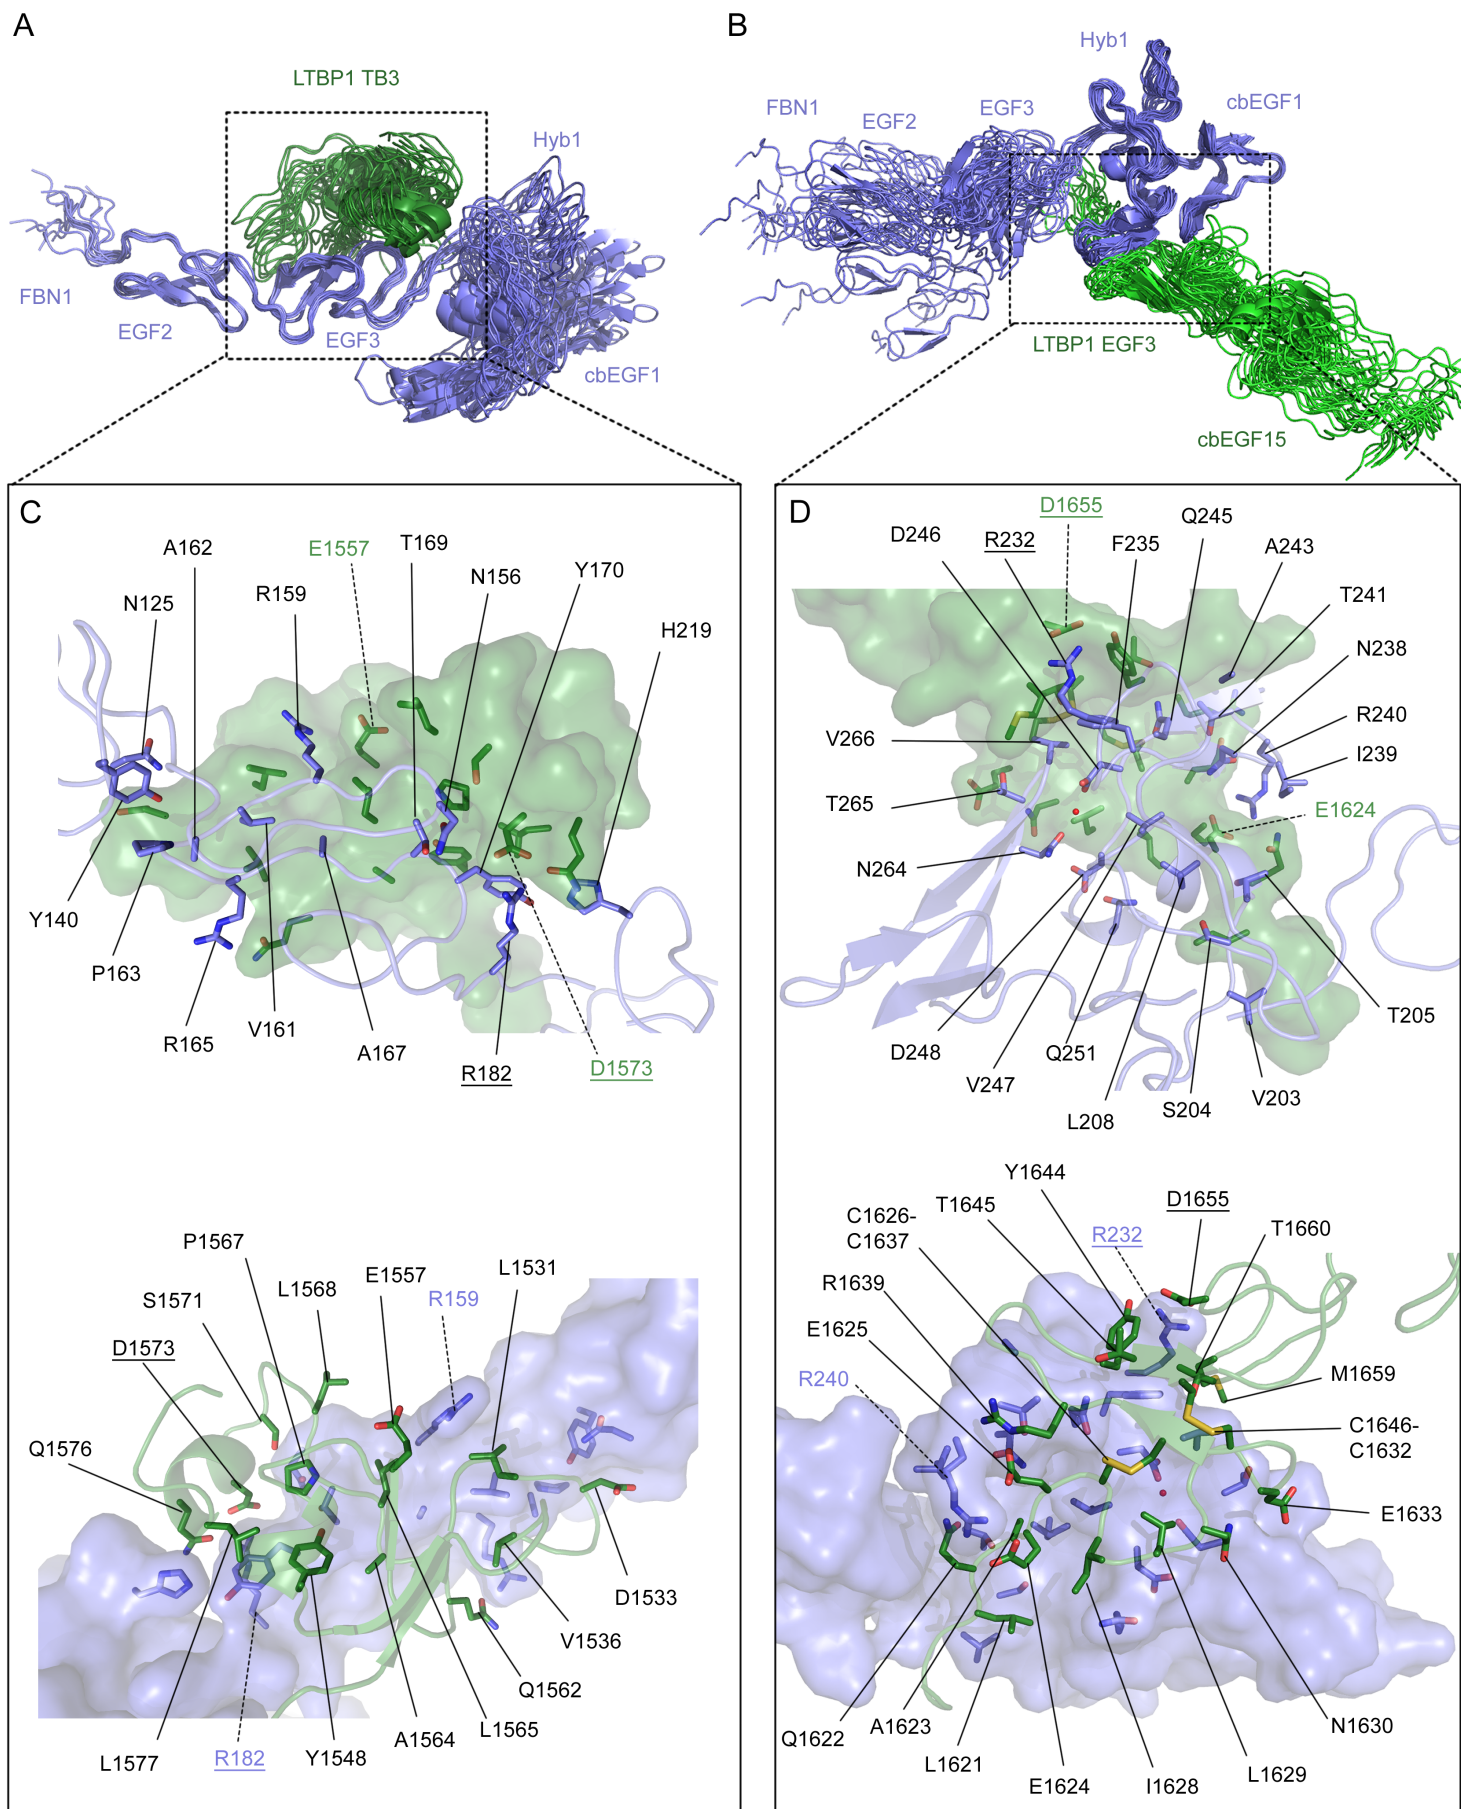

**Figure S6. Related to Figure 8. Details of LTBP1-FBN1 interfaces identified by HADDOCK**  
 (A) The top three best scoring HADDOCK clusters for the interaction of LTBP1<sup>TB3</sup> and FBN1<sup>E2cbEGF1</sup>



aligned by the EGF2-EGF3 domain pair of FBN1. (B) The top four best scoring HADDOCK clusters for the interaction of LTBP1<sup>E3cbEGF15</sup> with FBN1<sup>E2cbEGF1</sup> aligned by the Hyb1-cbEGF1 domain pair of FBN1. LTBP1 structures are coloured green and FBN1 coloured slate blue. (C) Residue side chains that form potential contacts between FBN1 EGF2-EGF3-Hyb1 and LTBP1 TB3. At the top FBN1 residues are highlighted and the surface of LTBP1 TB3 is shown in green, while on the bottom LTBP1 residues are highlighted and the surface of FBN1 is shown in slate blue. (D) Residue side chains that form potential contacts between FBN1 Hyb1-cbEGF1 and LTBP1 EGF3. On the top FBN1 residues are highlighted and the surface of LTBP1 EGF3 is shown in green, while on the bottom LTBP1 residues are highlighted and the surface of FBN1 is shown in slate blue. Residues identified as involved in salt bridges are underlined.

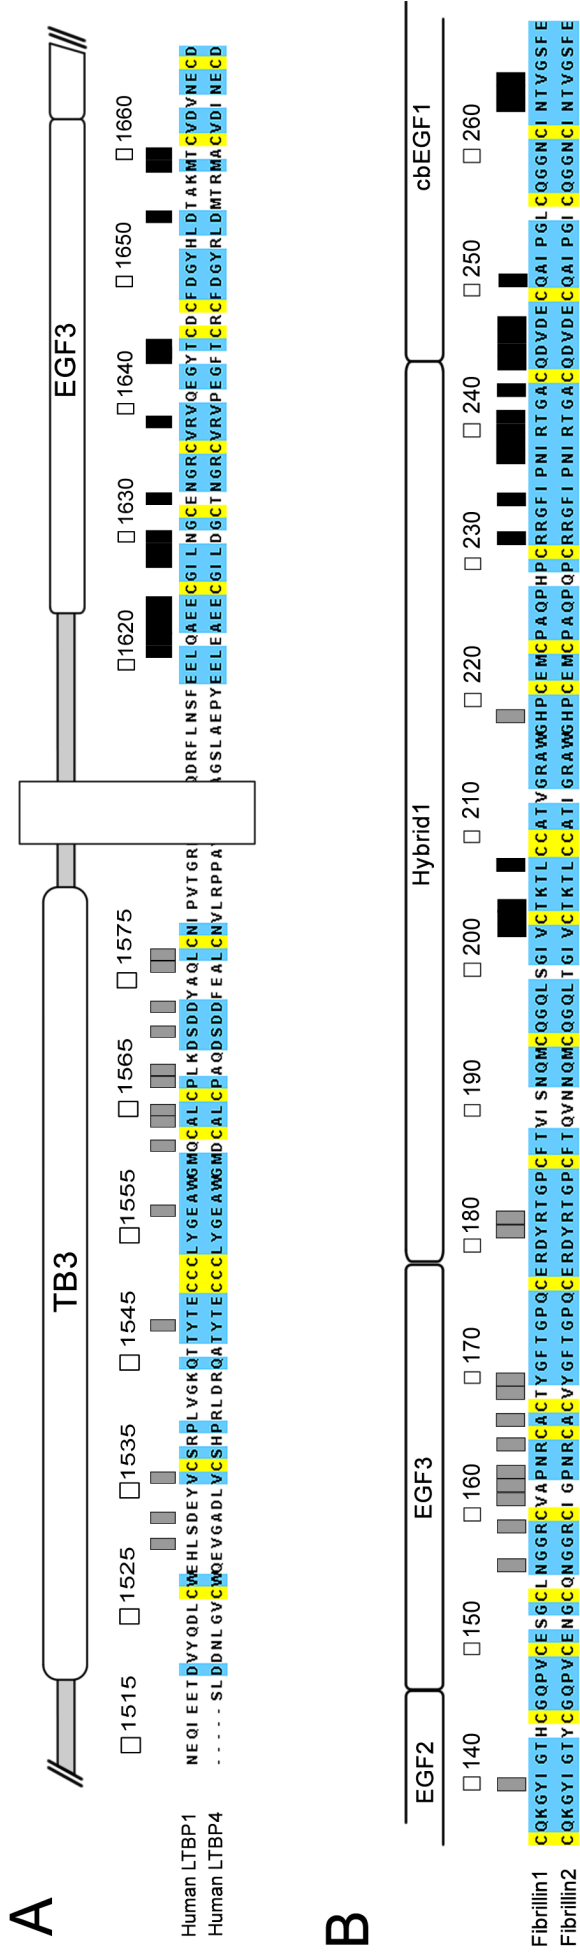

**Figure S7. Related to Figure 8– Alignments of FBN and LTBP**

(A) C-terminal region of LTBP1 implicated in FBN1 binding aligned with the C-terminal region of LTBP4. Grey boxes above the alignment indicate residues highlighted in Figure S6C as interacting with FBN1 EGF2-3 and Hyb1, while black boxes indicate residues highlighted in Figure S6D as interacting with FBN1 Hyb1-cbEGF1. Residues that are present in both sequences are highlighted blue, with the exception of cysteines which are highlighted yellow. A white box is shown where the inter-domain linker has been truncated. Comparison of the sequences of human LTBP1 and LTBP4 shows amino acid substitutions in both binding sites. The stronger FBN1 Hyb1-cbEGF1/LTBP1 EGF3 interface has substitutions Q1622E, N1630D, E1633T and T1660A while the weaker FBN1 EGF3-Hyb1/LTBP1 TB3 interface was substituted D1533A, Q1562D, L1568A and Q1576A. These substitutions alter the electrostatic properties of the binding sites in the LTBPs and could substantially change the mode of interaction with FBN1. (B) N-terminal region of FBN1 implicated in LTBP1 binding aligned with the N-terminal region of FBN2. Grey boxes above the alignment indicate residues highlighted in Figure S6C as interacting with LTBP1 TB3, while black boxes indicate residues highlighted in Figure S6D as interacting with LTBP1 EGF3. Residues that are present in both sequences are highlighted blue, with the exception of cysteines which are highlighted yellow. Comparison of the sequences of human FBN1 and FBN2 shows complete conservation of residues involved in the strong FBN Hyb1-cbEGF1/LTBP1 EGF3 interface whereas three substitutions (V161I, A162G and T169V) are observed in the weaker FBN EGF3-Hyb1/LTBP1 TB3 interface. A reduction of binding affinity in the latter site could explain the observed differences in binding for FBN1/FBN2. N164, associated with dominant ectopia lentis via the N164S substitution (Comeglio et al., 2002), is conserved in FBN1/FBN2.

**Supplemental Table S1. Related to Figure 8. – Restraints for final round of HADDOCK docking**

|                                               | LTBP1 <sup>TB3</sup> - FBN1 <sup>E2cbEGF1</sup> docking                                                                                                                                  | LTBP1 <sup>E3cbEGF15</sup> – FBN1 <sup>E2cbEGF1</sup> docking                                                                                                                                                |
|-----------------------------------------------|------------------------------------------------------------------------------------------------------------------------------------------------------------------------------------------|--------------------------------------------------------------------------------------------------------------------------------------------------------------------------------------------------------------|
| FBN1 active residues                          | 159,162,167,168,170,177,182                                                                                                                                                              | 204,227,232,235,239,241,242,243,244,245,246,249                                                                                                                                                              |
| FBN1 passive residues                         | 125,126,128,138,140,145,147,148,149,154,156,157,158,160,161,163,164,165,166,169,171,172,173,174,175,176,178,179,180,181,183,184,185                                                      | 203,205,206,207,208,210,211,212,217,224,225,226,228,229,230,231,233,234,236,237,238,240,247,248,251,252,253,254,256,264,266,267,269                                                                          |
| FBN1 fully flexible regions                   | 111-118, 178-185, 236-243                                                                                                                                                                | 111-118, 178-185, 236-243                                                                                                                                                                                    |
| LTBP1 active residues                         | 1523,1562,1563,1569,1571,1574,1577,1580                                                                                                                                                  | 1622,1623,1625,1626,1628,1630,1631,1632,1636,1638,1639,1641,1642,1643,1644,1646,1647,1648,1656,1655                                                                                                          |
| LTBP1 passive residues                        | 1529,1539,1548,1549,1550,1561,1570,1524,1525,1526,1528,1531,1532,1533,1534,1535,1536,1537,1546,1547,1553,1554,1559,1560,1564,1565,1566,1567,1568,1572,1573,1575,1576,1578,1579,1581,1582 | 1627,1628,1633,1634,1635,1637,1640,1644,1645,1649,1650,1651,1652,1653,1654,1657,1658,1659,1660,1661,1662,1620,1621,1622,1623,1624,1625,1626,1630,1631,1632,1636,1638,1639,1641,1642,1643,1646,1647,1648,1656 |
| LTBP1 fully flexible residues                 | 1521- 1527, 1579-1582                                                                                                                                                                    | 1617- 1625,1638-1645, 1653-1660                                                                                                                                                                              |
| Other restraints                              | ASSIGN (RESID 182 and NAME CZ and SEGID A) (RESID 1573 and NAME CG and SEGID C) 0.0 0.0 6.0                                                                                              | ASSIGN (RESID 232 and NAME CZ and SEGID A) (RESID 1655 and NAME CG and SEGID B) 0.0 0.0 6.0                                                                                                                  |
| HADDOCK results for highest scoring clusters  |                                                                                                                                                                                          |                                                                                                                                                                                                              |
| HADDOCK score                                 | -102.1 +/- 5.8                                                                                                                                                                           | -131.1 +/- 15.5                                                                                                                                                                                              |
| Cluster size                                  | 15                                                                                                                                                                                       | 7                                                                                                                                                                                                            |
| RMSD from the overall lowest-energy structure | 5.1 +/- 0.3                                                                                                                                                                              | 3.6 +/- 2.2                                                                                                                                                                                                  |
| Van der Waals energy                          | -56.3 +/- 3.9                                                                                                                                                                            | -81.6 +/- 4.9                                                                                                                                                                                                |
| Electrostatic energy                          | -162.3 +/- 16.6                                                                                                                                                                          | -220.3 +/- 52.5                                                                                                                                                                                              |
| Desolvation energy                            | -28.5 +/- 4.2                                                                                                                                                                            | -26.9 +/- 3.9                                                                                                                                                                                                |
| Restraints violation energy                   | 152.5 +/- 22.24                                                                                                                                                                          | 214.6 +/- 12.64                                                                                                                                                                                              |
| Buried Surface Area                           | 1707.7 +/- 55.4                                                                                                                                                                          | 2221.3 +/- 131.6                                                                                                                                                                                             |
| Z-Score                                       | -1.3                                                                                                                                                                                     | -1.5                                                                                                                                                                                                         |

**Supplemental Table S2. Related to Figure 7. – Primers for site-directed mutagenesis**

| Construct                             | Primer 5' > 3'                              |
|---------------------------------------|---------------------------------------------|
| <b>LTBP1:</b>                         |                                             |
| LTBP1 <sup>TB3E3</sup><br>D1521K fwd  | CAAATAGAAGAAACTAAGGTCTACCAAGATTTGTGCTGGGAAC |
| LTBP1 <sup>TB3E3</sup><br>D1521K rev  | GTTCCCAGCACAAATCTTGGTAGACCTTAGTTTCTTCTATTG  |
| LTBP1 <sup>TB3E3</sup><br>D1573R fwd  | CCCTGAAGGATTCAGATCGCTATGCTCAGCTGTGTAAC      |
| LTBP1 <sup>TB3E3</sup><br>D1573R rev  | GTTACACAGCTGAGCATAGCGATCTGAATCCTTCAGGG      |
| LTBP1 <sup>TB3E3</sup><br>E1625R fwd  | GTTACAGGCTGAGCGATGCGGCATCCTCAATGG           |
| LTBP1 <sup>TB3E3</sup><br>E1625R rev  | CCATTGAGGATGCCGCATCGCTCAGCCTGTAAC           |
| LTBP1 <sup>TB3E3</sup><br>E1642R fwd  | CTGTGTGAGGGTCCAGCGAGGTTACACCTGCG            |
| LTBP1 <sup>TB3E3</sup><br>E1642R rev  | CGCAGGTGTAACCTCGCTGGACCCTCACACAG            |
| LTBP1 <sup>TB3E3</sup><br>D1655R fwd  | GGGTATCACTTGCGTACGGCCAAGATGACCTGTG          |
| LTBP1 <sup>TB3E3</sup><br>D1655R rev  | CACAGGTCATCTTGGCCGTACGCAAGTGATACCC          |
|                                       |                                             |
|                                       |                                             |
|                                       |                                             |
|                                       |                                             |
| <b>Fibrillin1</b>                     |                                             |
| FBN1 <sup>E2cbEGF1</sup><br>K138D fwd | CACTGTCTATGCCAGGATGGATACATAGGGACTCACTG      |
| FBN1 <sup>E2cbEGF1</sup><br>K138D rev | CAGTGAGTCCCTATGTATCCATCCTGGCATAGACAGTG      |
| FBN1 <sup>E2cbEGF1</sup><br>R182E fwd | CCAGTGTGAAAGAGATTACGAGACAGGCCCATGTTTTAC     |
| FBN1 <sup>E2cbEGF1</sup><br>R182E rev | GTAAAACATGGGCCTGTCTCGTAATCTCTTTCACACTGG     |
| FBN1 <sup>E2cbEGF1</sup><br>R232E fwd | CCAGCCTCACCCCTGCGAACGTGGCTTCATTCC           |
| FBN1 <sup>E2cbEGF1</sup><br>R232E rev | GGAATGAAGCCACGTTTCGAGGGGTGAGGCTGG           |
| FBN1 <sup>E2cbEGF1</sup><br>C204S fwd | CAACTCAGCGGGATTGTCTCCACAAAAACGCTCTGCTGTG    |
| FBN1 <sup>E2cbEGF1</sup><br>C204S rev | CACAGCAGAGCGTTTTTGTGGAGACAATCCCGCTGAGTT     |
